# Supplementary material
Source: PubMed Central journal article supplement (PMC4669855)
Supplement: i1552-5783-56-13-7679-s07.pdf [file i1552-5783-56-13-7679-s07.pdf]

## **Supplementary Figure Legends**

Supplementary Figure S1. Optic disc photographs for animal A1 at specific time periods

Supplementary Figure S2. Optic disc photographs for animal J1 at specific time periods

Supplementary Figure S3. Optic disc photographs for animal O1 at specific time periods

Supplementary Figure S4. Fluorescein angiography for animal J1 at various time periods

Supplementary Figure S5. Fluorescein angiography for animal O1 at various time periods

Supplementary Figure S6. Fluorescein angiography for animal S1 at various time periods
